# Supplementary material for: Glutathione-directed synthesis of luminescent Ag2S nanoclusters as nanosensors for copper(ii) ions and temperature
Source: Royal Society of Chemistry journal article supplement (doi:10.1039/c5ra16455a), 2015-01-01
Supplement: c5ra16455a1.pdf [file c5ra16455a1.pdf]

## Electronic Supplementary Material

### **Glutathione-directed synthesis of luminescent Ag<sub>2</sub>S nanoclusters as nanosensors for copper(II) ion and temperature**

Lingcan Kong,<sup>\*a</sup> Wenwei Liu,<sup>a</sup> Xuefeng Chu,<sup>b</sup> Yuyang Yao,<sup>a</sup> Pengfei Zhu<sup>a</sup> and Xia Ling<sup>\*a</sup>

<sup>a</sup>*Wuxi Center for Disease Control and Prevention, Wuxi 214023, P.R. China*

<sup>b</sup>*Department of Basic Science, Jilin Jianzhu University, Changchun 130118, P. R. China*

*Email: [konglingcan2010@163.com](mailto:konglingcan2010@163.com); [wxcdclingxia@sina.com](mailto:wxcdclingxia@sina.com)*

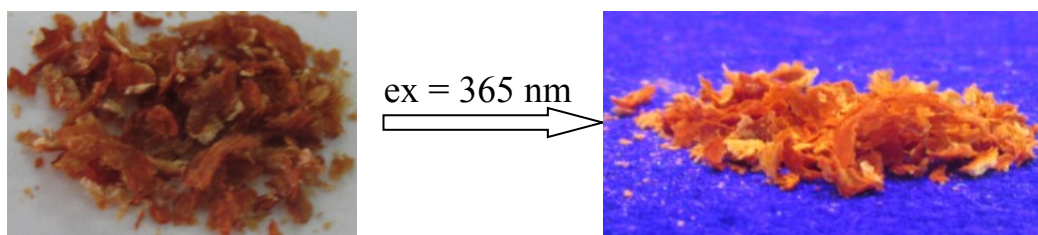

**Figure S1.** The powder of as-prepared  $\text{Ag}_2\text{S}$  NCs at the room temperature (left) and under a UV light with an excitation wavelength at 365 nm (right).

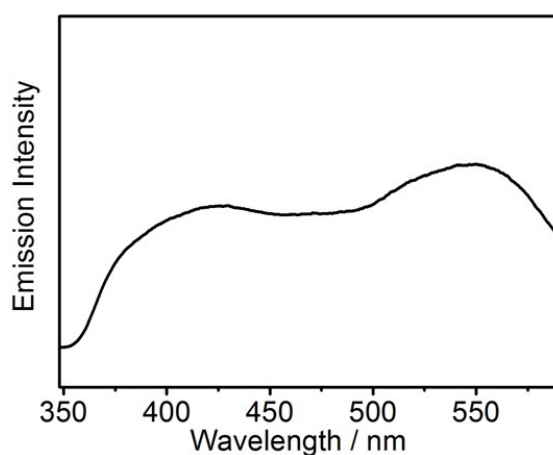

**Figure S2.** Excitation spectrum of  $\text{Ag}_2\text{S}$  NCs in aqueous solution.

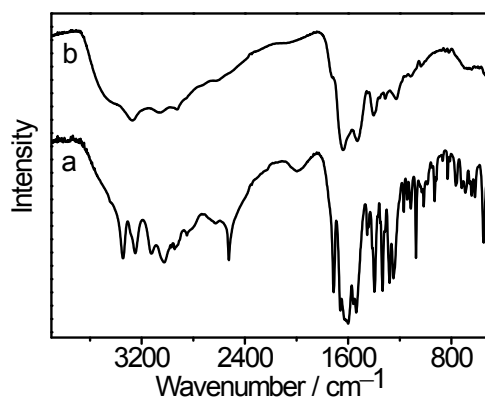

**Figure S3.** The FT-IR spectra of pure glutathione (a) and as-prepared  $\text{Ag}_2\text{S}$  NCs (b), which confirm that the surface of as-prepared  $\text{Ag}_2\text{S}$  NCs was protected by glutathione.

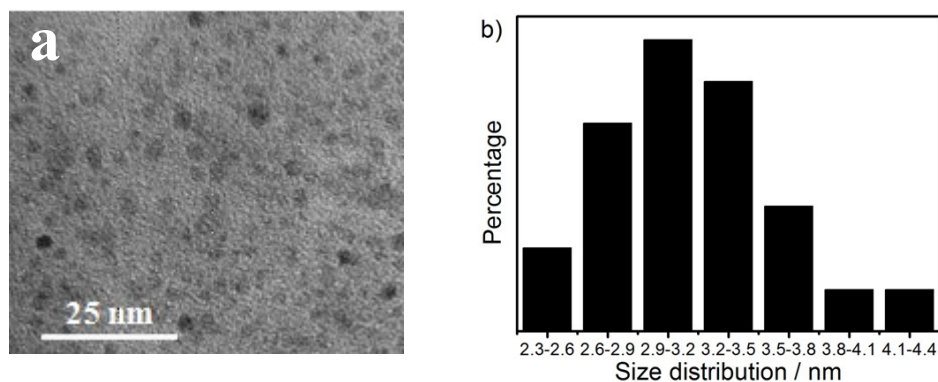

**Figure S4.** a) Typical TEM image of as-prepared Ag<sub>2</sub>S NCs in the presence of Cu<sup>2+</sup> ion; b) Size distribution: the average size was  $3.16 \pm 0.4$  nm.

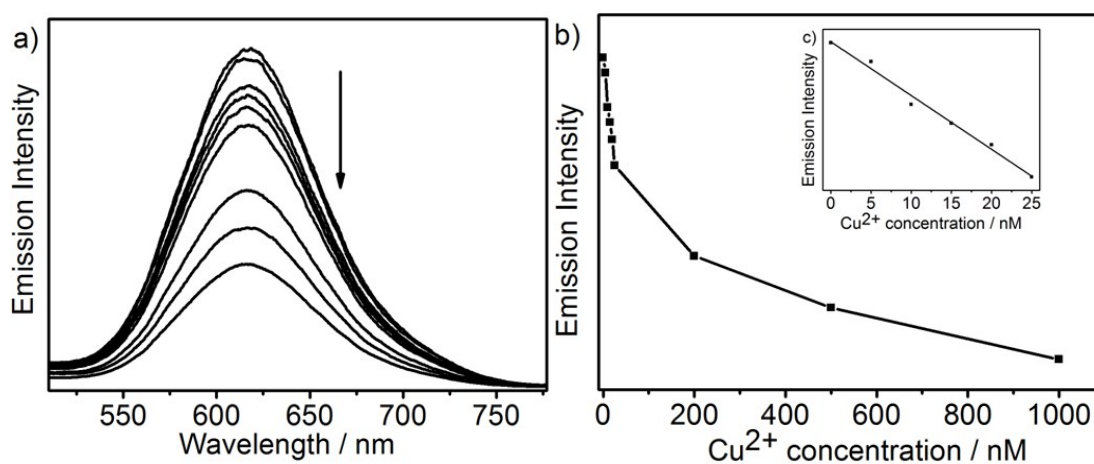

**Figure S5.** a) Emission spectral changes of Ag<sub>2</sub>S NCs in tap water upon addition of different amounts of Cu<sup>2+</sup> ions (0, 5, 10, 15, 20, 25, 200, 500, 1000 nM); b) Maximum emission intensity changes of a) as the function of different amounts of Cu<sup>2+</sup> ions; c) Linear region of calibration curve (0–25 nmol·L<sup>-1</sup> of Cu<sup>2+</sup> ions).

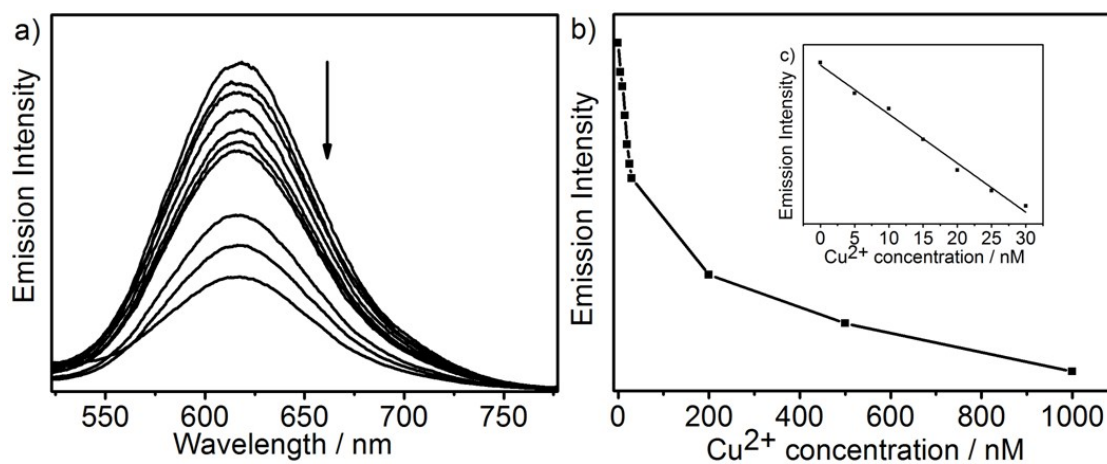

**Figure S6.** a) Emission spectral changes of Ag<sub>2</sub>S NCs in mineral water upon addition of different amounts of Cu<sup>2+</sup> ions (0, 5, 10, 15, 20, 25, 30, 200, 500, 1000 nM); b)

Maximum emission intensity changes of a) as the function of different amounts of  $\text{Cu}^{2+}$  ions; c) Linear region of calibration curve ( $0\text{--}30\text{ nmol}\cdot\text{L}^{-1}$  of  $\text{Cu}^{2+}$  ions).

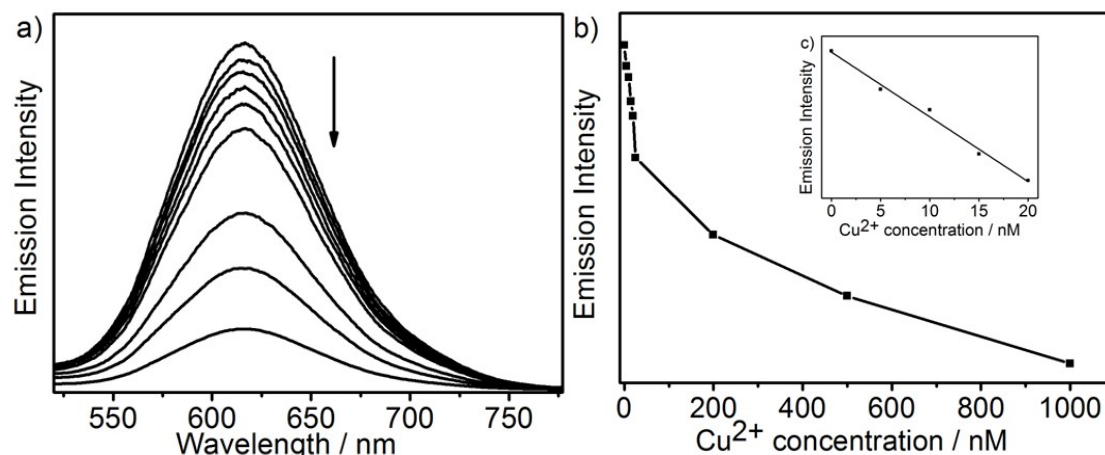

**Figure S7.** a) Emission spectral changes of  $\text{Ag}_2\text{S}$  NCs in Taihu lake water upon addition of different amounts of  $\text{Cu}^{2+}$  ions (0, 5, 10, 15, 20, 25, 200, 500, 1000 nM); b) Maximum emission intensity changes of a) as the function of different amounts of  $\text{Cu}^{2+}$  ions; c) Linear region of calibration curve ( $0\text{--}20\text{ nmol}\cdot\text{L}^{-1}$  of  $\text{Cu}^{2+}$  ions).

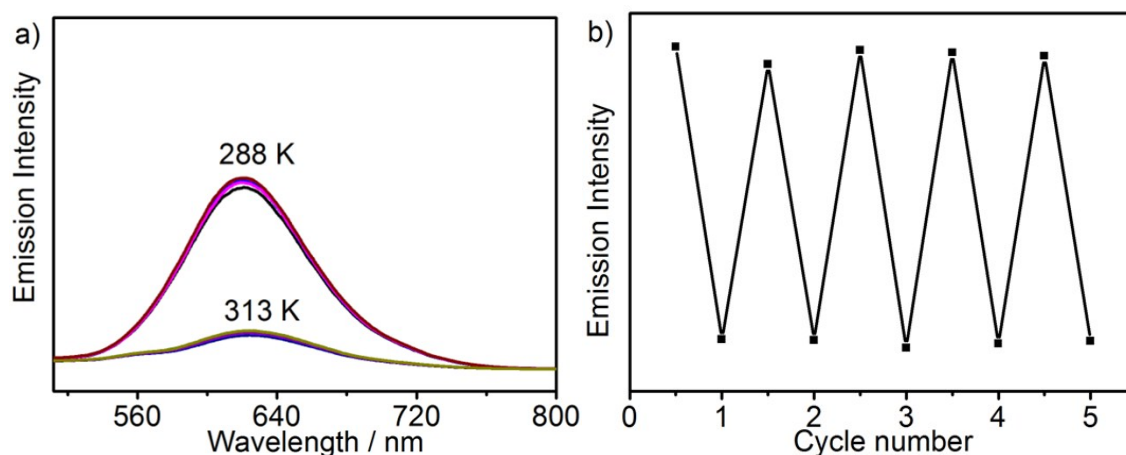

**Figure S8.** a) Emission spectral changes of  $\text{Ag}_2\text{S}$  NCs upon alternating temperatures between 288 K and 313 K; b) Emission intensity changes upon alternating temperatures between 288 K and 313 K.
